# Supplementary material for: Consumption of Mediterranean versus Western Diet Leads to Distinct Mammary Gland Microbiome Populations
Source: PubMed Central journal article supplement — Cell Rep. Author manuscript; Available in PMC 2019 Jan 18. (PMC6338220; doi:10.1016/j.celrep.2018.08.078), 2018-10-02
Supplement: NIHMS1509374-supplement-1.pdf [file NIHMS1509374-supplement-1.pdf]

**Cell Reports, Volume 25**

## **Supplemental Information**

### **Consumption of Mediterranean versus Western Diet**

#### **Leads to Distinct Mammary Gland**

#### **Microbiome Populations**

**Carol A. Shively, Thomas C. Register, Susan E. Appt, Thomas B. Clarkson, Beth Uberseder, Kenysha Y.J. Clear, Adam S. Wilson, Akiko Chiba, Janet A. Tooze, and Katherine L. Cook**

**Supplemental Table S1.** Ingredients in experimental diets. Related to Table 1.

| <b>Western Diet</b>           |            | <b>Mediterranean Diet</b>           |            |
|-------------------------------|------------|-------------------------------------|------------|
| DIET #: 1523                  |            | DIET #: 1530 (1497 + Banana)        |            |
| INGREDIENT                    | g/ 100g    | INGREDIENT                          | g/100 g    |
| Casein, USP                   | 8.50       | Casein, USP                         | 1.74       |
| Whey Protein 895              | 8.50       | Whey protein - 895                  | 1.74       |
|                               |            | Dried Egg white                     | 2.61       |
|                               |            | Fishmeal (Menhaden)                 | 2.61       |
|                               |            | Walnuts                             | 0.87       |
|                               |            | Black Bean flour                    | 4.35       |
|                               |            | Garbanzo Bean flour                 | 1.74       |
|                               |            | Wheat Flour (S.Biscuit all purpose) | 24.35      |
| Dextrin                       | 26.00      | Dextrin                             | 9.66       |
| Sucrose                       | 18.00      | Sucrose                             | 3.48       |
| High Fructose Corn Syrup -55  | 7.00       | Banana                              | 13.04      |
|                               |            | Applesauce                          | 3.82       |
|                               |            | Tomato paste                        | 1.74       |
| Cellulose (Alphacel)          | 7.94       | Cellulose (Alphacel)                | 9.48       |
| Total Fiber (% of diet)       | 7.94       | Total fiber (% of diet)             | 12.7       |
| Lard                          | 4.15       | Olive Oil (Filippo Berio)*          | 6.17       |
| Beef Tallow HHR*              | 4.00       | Menhaden Oil (Omegapure)            | 0.87       |
| Butter, lightly salted        | 1.25       | Butter, lightly salted              | 0.87       |
| Corn Oil                      | 3.50       | Corn Oil                            | 1.04       |
| Flaxseed oil                  | 0.30       | Flaxseed oil                        | 0.17       |
| Dried Egg Yolk                | 0.60       | Dried Egg Yolk                      | 1.48       |
| Crystalline Cholesterol       | 0.04       |                                     |            |
| Complete Vitamin Mix (Teklad) | 2.50       | Complete Vitamin Mix (Teklad)       | 2.17       |
| Mineral Mix w/o Ca, P, NaCl   | 5.00       | Mineral Mix w/o Ca, P, NaCl         | 4.35       |
| Calcium Carbonate             | 0.43       | Calcium Carbonate                   | 0.37       |
| Calcium Phosphate, Monobasic  | 0.75       | Calcium Phosphate, Monobasic        | 0.65       |
| NaCl (Table Salt)             | 1.60       | NaCl (Table Salt)                   | 0.63       |
| <b>TOTAL</b>                  | <b>100</b> | <b>TOTAL</b>                        | <b>100</b> |

**Supplemental Table S2.** Experimental diet composition compared with human dietary patterns. Related to Table 1.

|                           | Human              |                      | Nonhuman Primate*  |                    |
|---------------------------|--------------------|----------------------|--------------------|--------------------|
|                           | Western            | Mediterranean        | Western            | Mediterranean      |
|                           | % of Calories      | % of Calories        | % of Calories      | % of Calories      |
| <b>Protein</b>            | 15 <sup>1</sup>    | 17 <sup>2</sup>      | 16                 | 16                 |
| <b>Carbohydrate</b>       | 51 <sup>1</sup>    | 51 <sup>2</sup>      | 54                 | 54                 |
| <b>Fat</b>                | 33 <sup>1</sup>    | 32 <sup>2</sup>      | 31                 | 31                 |
|                           | % of Total Fats    | % of Total Fats      | % of Total Fats    | % of Total Fats    |
| <b>Saturated</b>          | 33 <sup>1</sup>    | 21 <sup>2</sup>      | 37                 | 21                 |
| <b>Monounsaturated</b>    | 36 <sup>1</sup>    | 56 <sup>2</sup>      | 36                 | 57                 |
| <b>Polyunsaturated</b>    | 24 <sup>1</sup>    | 15 <sup>2</sup>      | 25                 | 20                 |
| <b>ω6:ω3 Fatty Acids</b>  | 15:1 <sup>5</sup>  | 2.1-3:1 <sup>6</sup> | 14.9:1             | 2.9:1              |
| <b>Cholesterol mg/Cal</b> | 0.13 <sup>1</sup>  | 0.16 <sup>2</sup>    | 0.16               | 0.15               |
| <b>Fiber g/Cal</b>        | 0.01 <sup>1</sup>  | 0.03 <sup>3</sup>    | 0.02 <sup>1</sup>  | 0.04 <sup>3</sup>  |
| <b>Sodium mg/Cal</b>      | 1.7 <sup>1,4</sup> | 1.3 <sup>2,3</sup>   | 1.7 <sup>1,4</sup> | 1.1 <sup>2,3</sup> |

<sup>1</sup> US Dept of Agriculture 2014, women 40-49 from NHANES *What We Eat* 2011-2012 <sup>2</sup> Bedard,A., Riverin,M., Dodin,S., Corneau,L., and Lemieux,S. (2012). Sex differences in the impact of the Mediterranean diet on cardiovascular risk profile. *Br. J. Nutr.* 108, 1428-1434. (23)

<sup>3</sup> Kafatos,A., Verhagen,H., Moschandreas,J., Apostolaki,I., and Van Westerop,J.J. (2000). Mediterranean diet of Crete: foods and nutrient content. *J. Am. Diet. Assoc.* 100, 1487-1493. (24)

<sup>4</sup> Powles,J., Fahimi,S., Micha,R., Khatibzadeh,S., Shi,P., Ezzati,M., Engell,R.E., Lim,S.S., Danaei,G., and Mozaffarian,D. (2013). Global, regional and national sodium intakes in 1990 and 2010: a systematic analysis of 24 h urinary sodium excretion and dietary surveys worldwide. *BMJ Open.* 3, e003733.(57)

<sup>5</sup> Simopoulos,A.P. (2006). Evolutionary aspects of diet, the omega-6/omega-3 ratio and genetic variation: nutritional implications for chronic diseases. *Biomed. Pharmacother.* 60, 502-507. (58)

<sup>6</sup> Cordain,L., Eaton,S.B., Sebastian,A., Mann,N., Lindeberg,S., Watkins,B.A., O'Keefe,J.H., and Brand-Miller,J. (2005). Origins and evolution of the Western diet: health implications for the 21st century. *Am. J. Clin. Nutr.* 81, 341-354.(25)

\*These values were determined by diet composition analysis

**Supplemental Figures and Legends:**

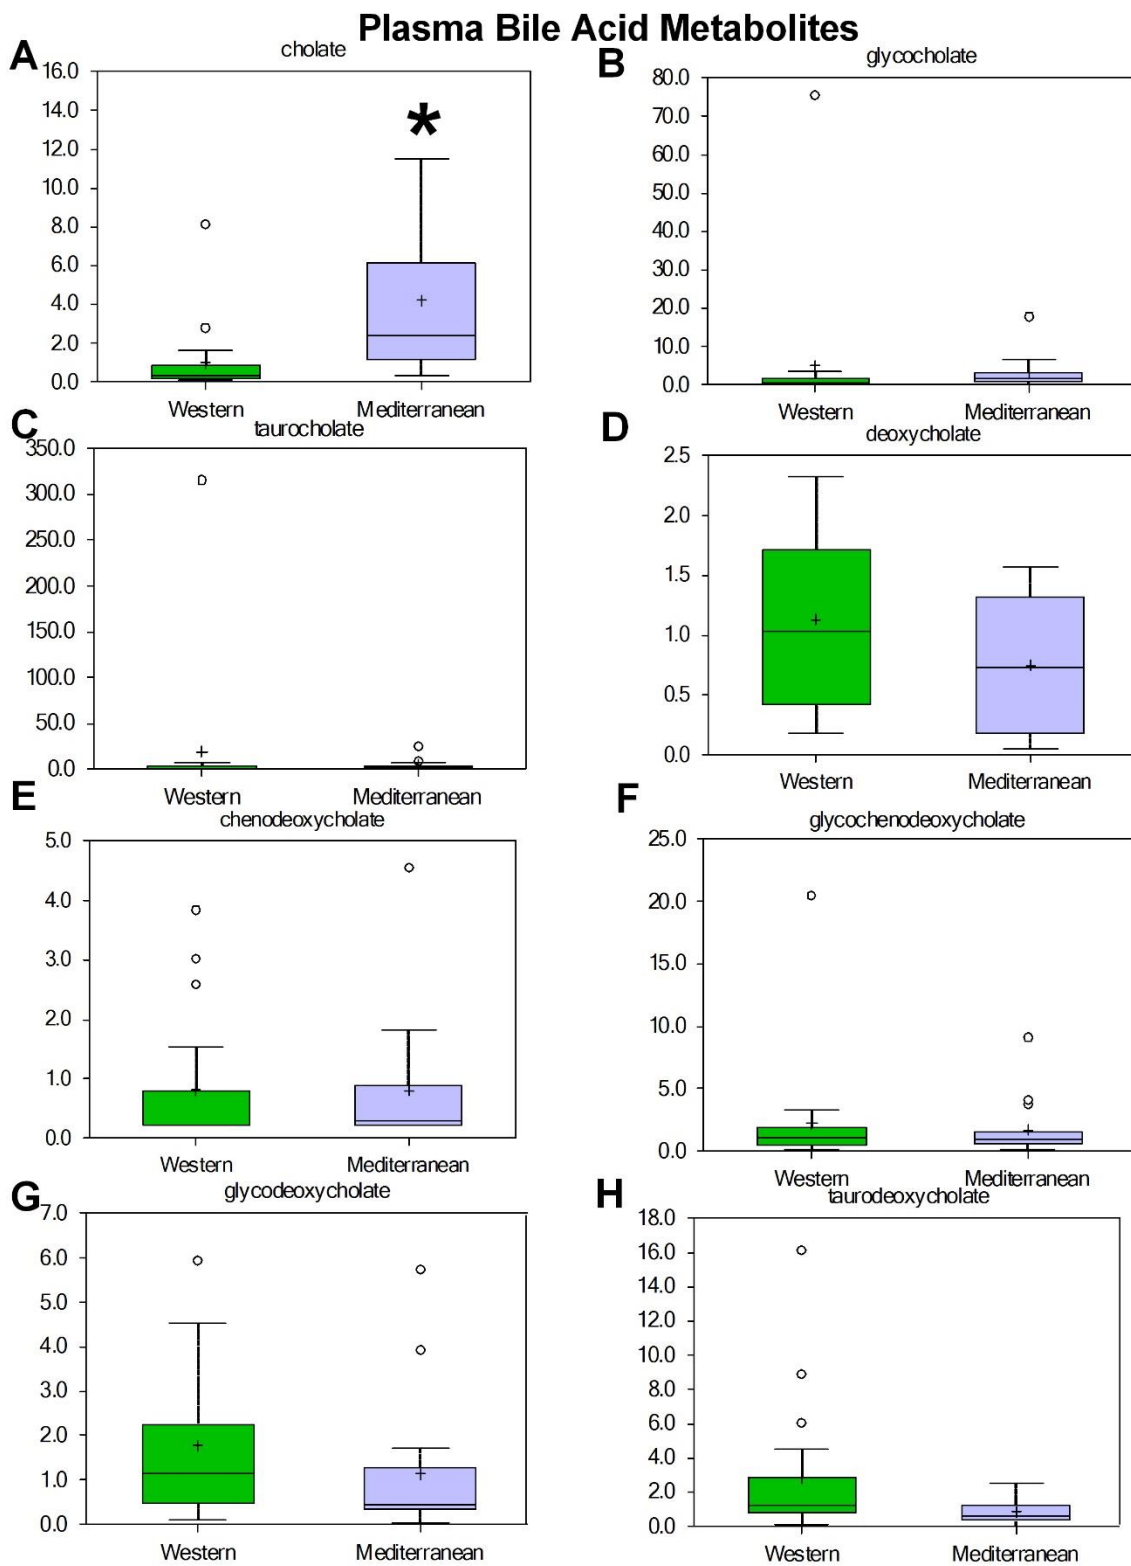

**Supplemental Figure S1.** Plasma bile acid metabolite levels in monkeys consuming a Western diet or Mediterranean diet for 23 months. Related to Figure 4. n=17-21; \*p<0.05.

## Mammary Gland Parental Amino Acid Metabolites

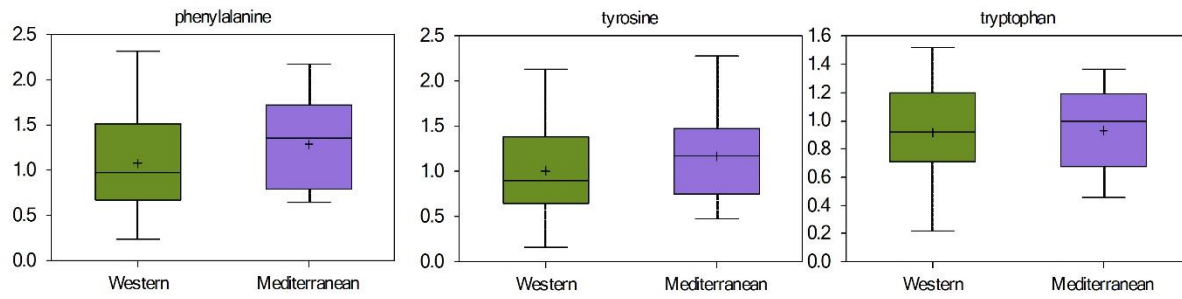

## Circulating Plasma Parental Amino Acid Metabolites

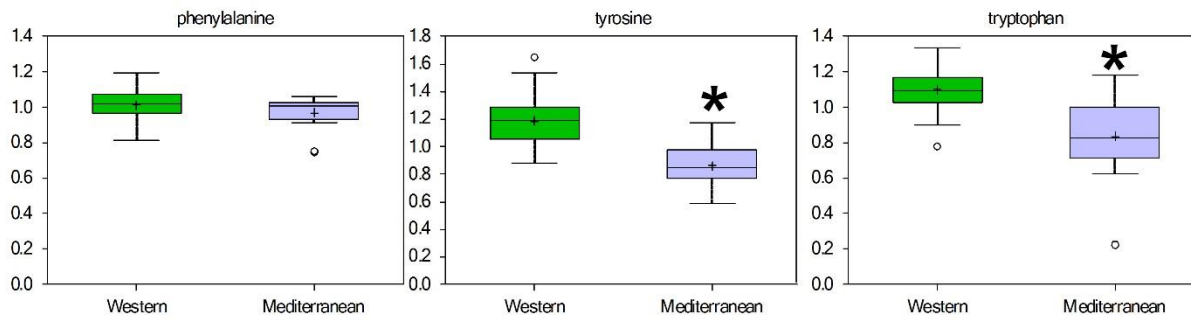

**Supplemental Figure S2.** Mammary gland and plasma phenylalanine, tyrosine, and tryptophan amino acid levels in monkeys fed a Western diet or a Mediterranean diet. Related to Figure 5. n=17-21; \*p<0.05.

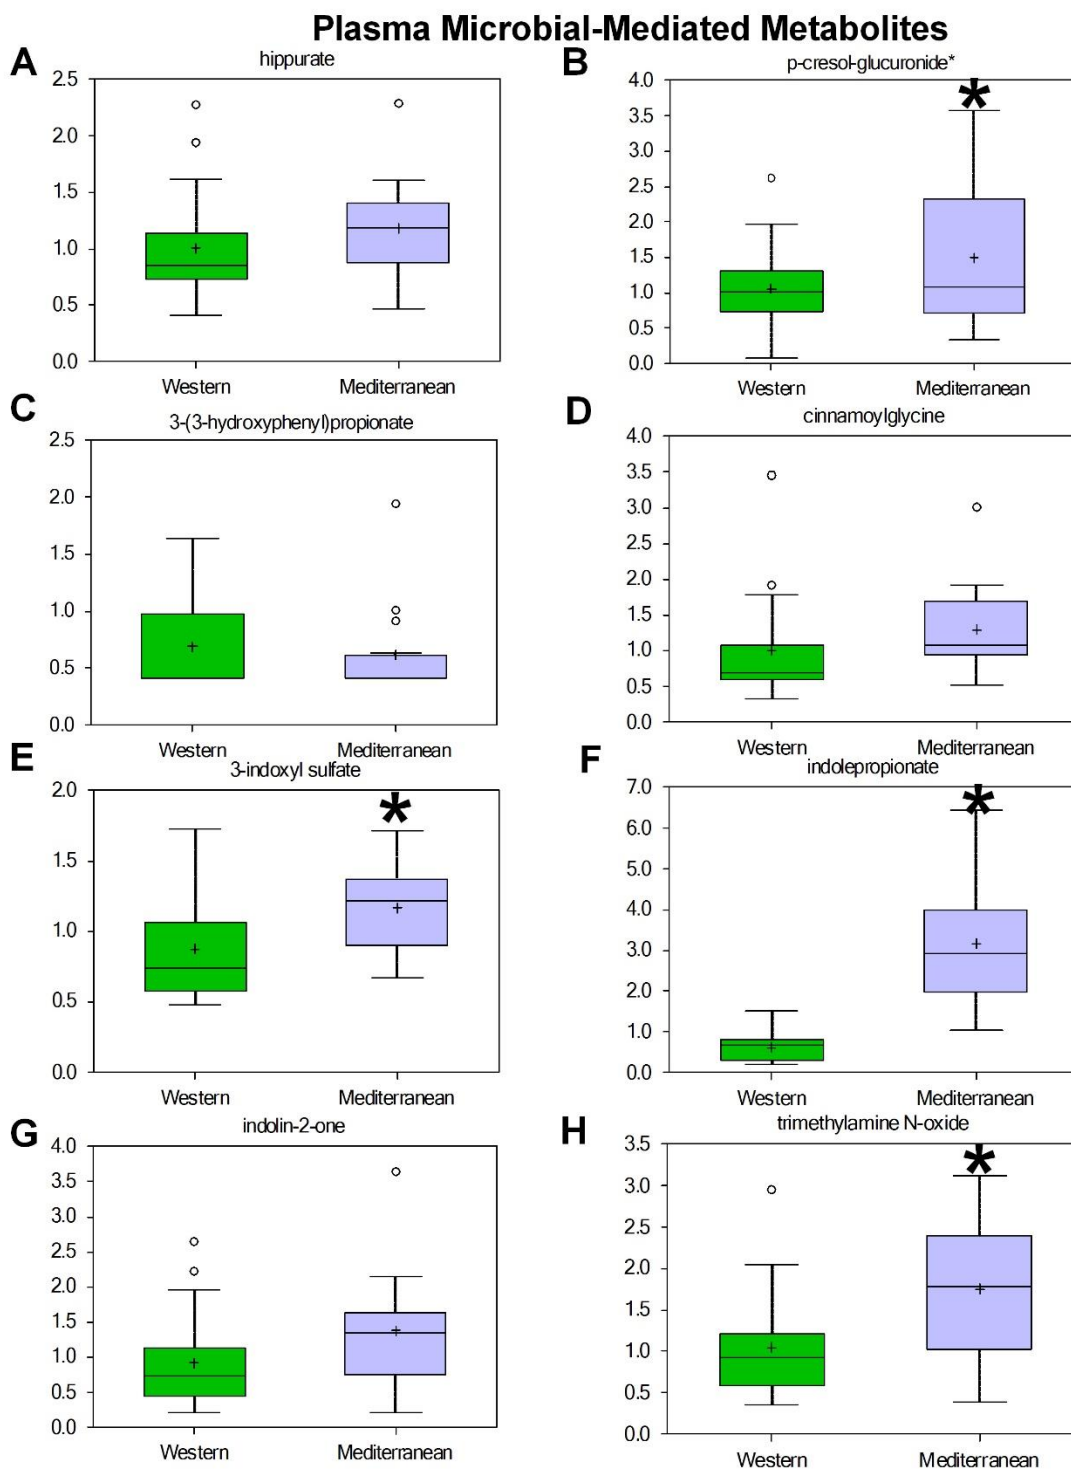

**Supplemental Figure S3.** Plasma concentrations of microbial-modulated bioactive compounds in monkeys consuming a Western diet or Mediterranean diet for 23 months. Related to Figure 5. n=17-21; \*p<0.05.
